# Supplementary material
Source: PubMed Central journal article supplement (PMC3434746)
Supplement: supp_194.13.3502_SuppMaterial1.pdf [file supp_194.13.3502_SuppMaterial1.pdf]

## Supplemental Material

**Table S1.** Primers used to verify location of transposon insertions in PA14 NR transposon

insertion library mutants

| <b>MexT, MexE, MexF, and other RND efflux pumps</b> |                  |                        |                         |                     |
|-----------------------------------------------------|------------------|------------------------|-------------------------|---------------------|
| <b>PA14 NR set plate position</b>                   | <b>Gene name</b> | <b>Locus name PA14</b> | <b>Primer 5' - 3'</b>   | <b>Product size</b> |
| PAMr_nr_mas_12_1:E6                                 | <i>mexT</i>      | PA14_32410             | TACGCGGGTTGACCTGGTTGT   | 1586 bp             |
| PAMr_nr_mas_13_3:E11                                | <i>mexE</i>      | PA14_32400             | TACGCGGGTTGACCTGGTTGT   | 308 bp              |
| PAMr_nr_mas_07_1:B11                                | <i>mexF</i>      | PA14_32390             | CGATAGGAAGAACCGATGAA    | 423 bp              |
| PAMr_nr_mas_06_3:E9                                 | <i>czcA</i>      | PA14_31010             | TCGACGTTGGAACGATGA      | 379 bp              |
| PAMr_nr_mas_08_2:E2                                 | <i>muxB</i>      | PA14_31890             | CTGGCCAAGGGTTACTCCCT    | 402 bp              |
| PAMr_nr_mas_13_3:G10                                | <i>mexQ</i>      | PA14_18780             | CAGATGATGAAGGCCACTGA    | 374 bp              |
| PAMr_nr_mas_02_3:D3                                 | <i>mexK</i>      | PA14_16820             | GACATCCATTCCAGCGAGAT    | 311 bp              |
| PAMr_nr_mas_05_1:E4                                 | <i>mexI</i>      | PA14_09520             | AACACCAGGGTGTTCCT       | 348 bp              |
| PAMr_nr_mas_10_4:E12                                | <i>mexW</i>      | PA14_56890             | TTACCGATCCGTTTCATCCGT   | 353 bp              |
| PAMr_nr_mas_03_1:A9                                 | <i>mexD</i>      | PA14_60830             | TCGAAGGTGACGACGATCTC    | 314 bp              |
| PAMr_nr_mas_02_2:C3                                 | <i>triC</i>      | PA14_01970             | TCCGAACGGAAGTTGCCGGA    | 368 bp              |
| PAMr_nr_mas_02_4:E12*                               | <i>mexA</i>      | PA14_05530             | TATTGGCTACCGTCCCTCCAG   | 594 bp              |
| PAMr_nr_mas_03_1:G11                                | <i>mexN</i>      | PA14_45890             | TCCGATCATGATGACCACCT    | 334 bp              |
| PAMr_nr_mas_11_4:G11                                | <i>mexY</i>      | PA14_38410             | AAGCGAGTACGGCTTCGTCT    | 435 bp              |
| <b>RND-associated outermembrane porins</b>          |                  |                        |                         |                     |
| <b>PA14 NR set plate position</b>                   | <b>Gene name</b> | <b>Locus name PA14</b> | <b>Primer 5' - 3'</b>   | <b>Product size</b> |
| PAMr_nr_mas_13_4:B8                                 | <i>oprN</i>      | PA14_32380             | TGAACCAGTTGGTCGAACAGT   | 370 bp              |
| PAMr_nr_mas_11_1:F3                                 | <i>opmB</i>      | PA14_31920             | TTTCCCCGACCTCACCTGA     | 653 bp              |
| PAMr_nr_mas_12_3:F3                                 | <i>opmI</i>      | PA14_13520             | AACGAGAGCTGGACGTAGGC    | 380 bp              |
| PAMr_nr_mas_05_2:F12                                | <i>opmG</i>      | PA14_68120             | TGCAACACGTCGCTGGTGTG    | 242 bp              |
| PAMr_nr_mas_09_1:F4                                 | <i>opmH</i>      | PA14_65750             | ACTGGCAGGGTGTGGCGCAT    | 302 bp              |
| PAMr_nr_mas_08_3:D1                                 | <i>oprM</i>      | PA14_05550             | ACGAGGCGTCCAAGCAGCAA    | 293 bp              |
| PAMr_nr_mas_05_4:A5                                 | <i>opmE</i>      | PA14_18790             | GCCCTGGAGTCTCTGATCCA    | 380 bp              |
| PAMr_nr_mas_12_1:D6                                 | <i>oprJ</i>      | PA14_60820             | CGTGCTGTTCGTACCCATCT    | 353 bp              |
| PAMr_nr_mas_11_3:F4                                 | <i>opmD</i>      | PA14_09500             | TTCCGGTGCTCGCTGCCAGTT   | 215 bp              |
| PA14_31970 (not available)                          | <i>czcC</i>      | PA14_31970             |                         |                     |
| <b>Tn7 transposon-specific primer</b>               |                  |                        |                         |                     |
| PMFLGM.GB-3a                                        |                  |                        | TACAGTTTACGAACCGAACAGGC | -                   |

\*the location of the Tn7 insertion in the *mexB* mutant PAM\_nr\_mas\_06\_2:H10 could not be validated by PCR

**Table S2.** Primer sequences used for inverse PCR reactions and sequencing to map Tn5 insertions in PA14*nfxC*

| <b><i>NarI</i>-digested gDNA</b>   | <b>Primer sequence 5' – 3'</b> |
|------------------------------------|--------------------------------|
| IPCR primer 1 (Tn5- <i>NarI</i> )  | CATTCAGGTCGAGGTGGCCCG          |
| IPCR primer 2 (Tn5-out2)           | CAGAACATATCCATCGCGTCCGCC       |
| Sequencing primer (Tn5-out3)       | CGGTTTACAAGCATAAAGCTTGC        |
| <b><i>SstII</i>-digested gDNA</b>  |                                |
| IPCR primer 1 (Tn5- <i>SstII</i> ) | GTCAAAGGACGATTTTCGGTTTGG       |
| IPCR primer 2 (Tn5-out)            | GATCCCCGGGTACCGAGCTCGAATTC     |
| Sequencing primer (Tn5-out-seq)    | CCGGGTACCGAGCTCGAATTCG         |
| <b><i>SphI</i>-digested gDNA</b>   |                                |
| IPCR primer 1 (Tn5- <i>SphI</i> )  | GACATGCGGATGTTATTGTCGCTTGGG    |
| IPCR primer 2 (Tn5-out)            | GATCCCCGGGTACCGAGCTCGAATTC     |
| Sequencing primer (Tn5-out-seq)    | CCGGGTACCGAGCTCGAATTCG         |

**Table S3.** Inverse PCR reactions and cycling conditions

| <b>Reagent</b>                     | <b>Volume (μl)</b> | <b>Step</b> | <b>PCR Cycling Conditions</b>   |
|------------------------------------|--------------------|-------------|---------------------------------|
| Template (Ligation reaction)       | 2.5                | 1           | 95°C for 3 min                  |
| 10 mM dNTPs (2.5 mM each)          | 2                  | 2           | 95°C for 30 sec                 |
| 10 μM Primer 1                     | 0.5                | 3           | 65°C for 1 min (as low as 58°C) |
| 10 μM Primer 2                     | 0.53               | 4           | 72°C for 3 min                  |
| 10 X Invitrogen Buffer             | 2.5                | 5           | Go to Step 2, 4X                |
| 50 mM Invitrogen MgCl <sub>2</sub> | 1                  | 6           | 95°C for 30 sec                 |
| H <sub>2</sub> O                   | 15.9               | 7           | 60°C for 1 min (as low as 58°C) |
| Invitrogen Taq (5 U/ul)            | 0.125              | 8           | 72°C for 3 min                  |
| Final Volume                       | 25                 | 9           | Go to Step 6, 29X               |
|                                    |                    | 10          | 4°C forever                     |

Supplemental Figure S1.

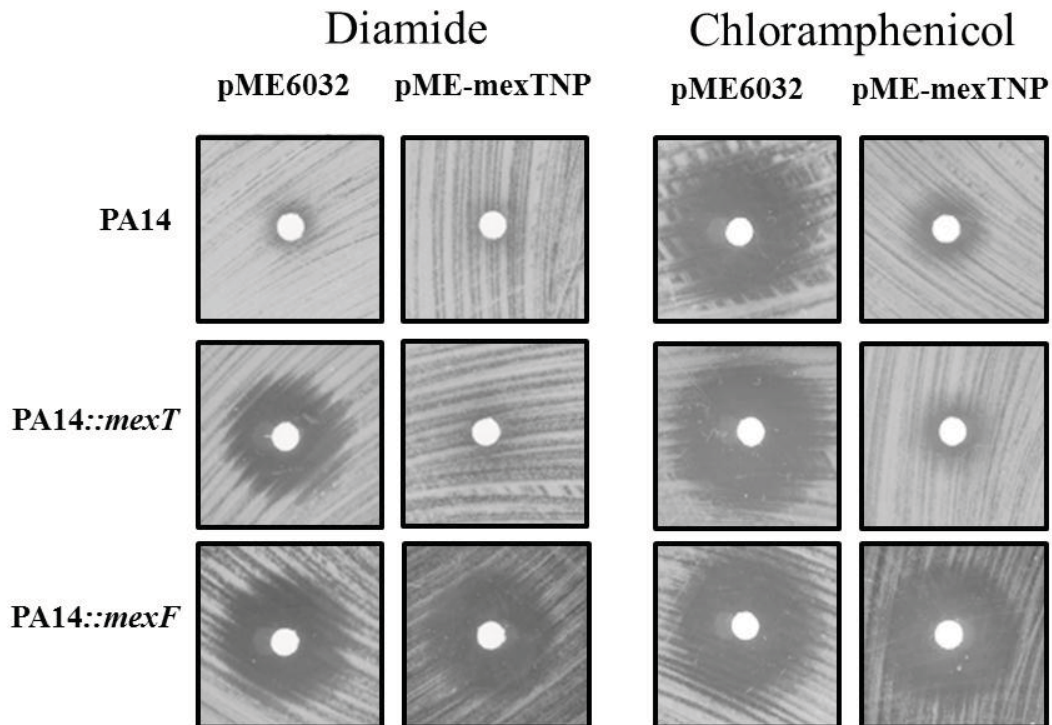

**Figure S1. Complementation of diamide susceptibility phenotype.** The impact of *mexT* overexpression on diamide and chloramphenicol susceptibility was determined in PA14, PA14::*mexT*, and PA14::*mexF* by disc diffusion as described in materials and methods. Agar was supplemented with 25  $\mu\text{g ml}^{-1}$  tetracycline to select for the pME6032-derived *mexT* overexpression construct and vector control and 1mM IPTG was added to drive expression of *mexT*. Overexpression of *mexT* complemented the diamide resistance phenotype of PA14::*mexT* but not PA14::*mexF* suggesting that *mexT* mediates this effect via *mexF*. In addition, while disruption of *mexT* had no noticeable effect on chloramphenicol resistance levels, *mexT* overexpression leads to increased chloramphenicol resistance which is dependent on *mexF* as previously reported (1). This supports the role of *mexF* in mediating intrinsic diamide resistance via a MexT-dependent induction pathway. Images are representative of three independent experiments.

Supplemental Figure S2.

| Chloramphenicol MIC ( $\mu\text{g/ml}$ ) |                  |                        |                        |                        |
|------------------------------------------|------------------|------------------------|------------------------|------------------------|
| PA14                                     | PA14 <i>nfxC</i> | PA14 <i>nfxC::mexT</i> | PA14 <i>nfxC::mexF</i> | PA14 <i>nfxC::oprN</i> |
| 75                                       | >1200            | 75                     | 75                     | 600                    |

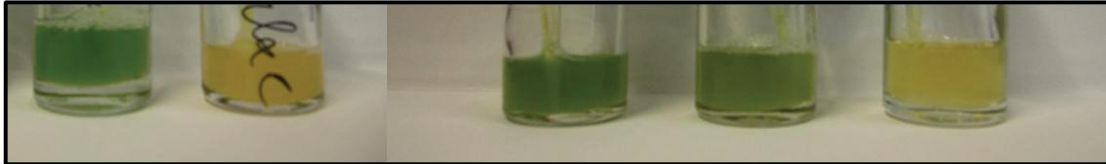

**Figure S2. Phenotypic properties of mutants from Tn5 mutagenesis screen for restoration of chloramphenicol susceptibility in PA14*nfxC*.** Mutants retrieved from the Tn5 screen with insertions which mapped to *mexT*, *mexF* and *oprN* were investigated. Chloramphenicol susceptibility and phenazine production (green pigment) were restored to wild type levels in PA14*nfxC::mexT* and PA14*nfxC::mexF*. However, Chloramphenicol susceptibility was not fully restored to wild type levels in PA14*nfxC::oprN*, which also exhibited reduced phenazine production compared to PA14*nfxC*.

Supplemental Figure S3.

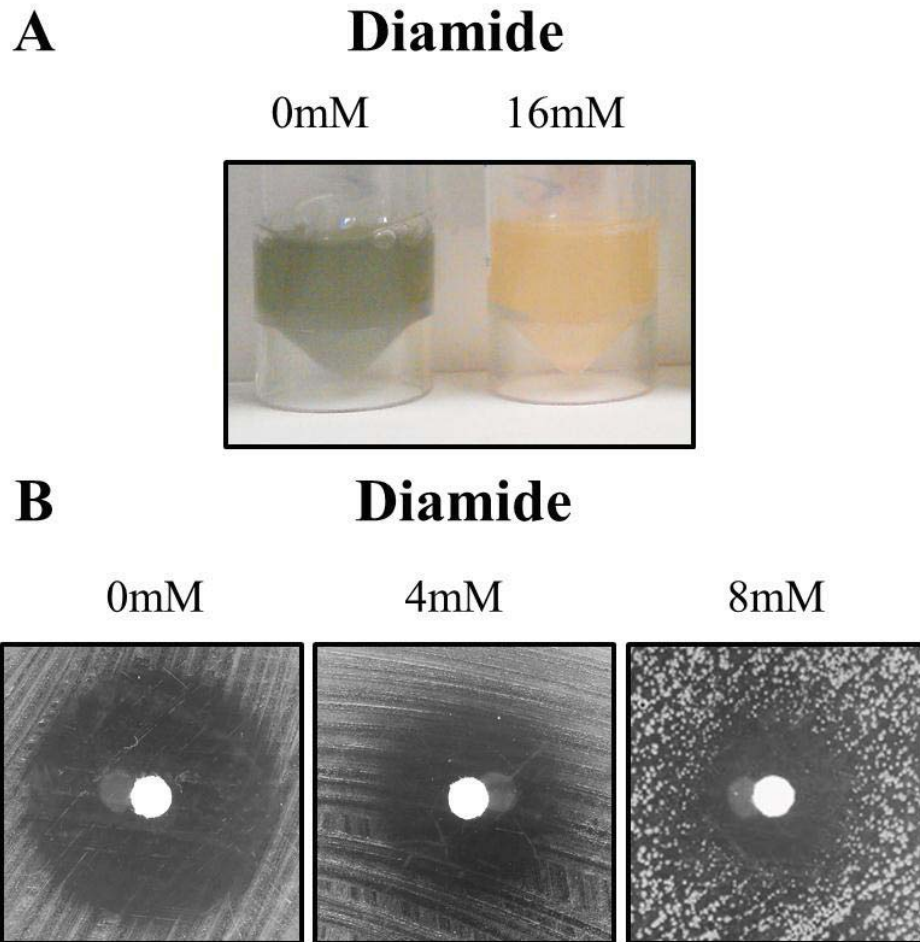

**Figure S3. Impact of diamide on phenazine production and chloramphenicol resistance in PA14.** Overnight cultures of PA14 grown in LB broth in the presence of 16mM diamide exhibit a marked reduction in phenazine production (A). The inhibitory zone surrounding a chloramphenicol disk (200  $\mu$ g) was substantially reduced in the presence of 4 or 8 mM diamide (B). Although growth of PA14 on LB agar was somewhat inhibited at 8 mM diamide, a clearly smaller inhibitory zone surrounded the chloramphenicol disk. Results are representative of three independent experiments.

Supplemental Figure S4.

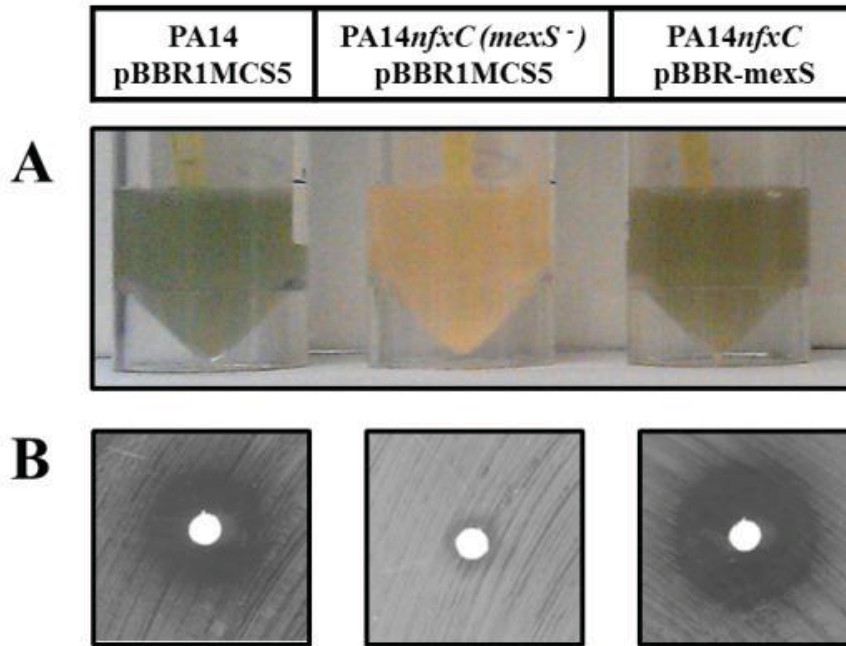

**Figure S4. Complementation of phenazine production and chloramphenicol sensitivity in PA14*nfxC*.** Overnight cultures of the *mexS* deficient strain PA14*nfxC* grown in LB broth exhibit markedly reduced phenazine production (green pigment), which is restored by complementation with pBBR-*mexS* (A). The increased chloramphenicol resistance observed in PA14*nfxC* is also complemented when a functional copy of *mexS* is introduced to PA14*nfxC* (B).

1. **Tian, Z. X., M. Mac Aogáin, H. F. O'Connor, E. Fargier, M. J. Mooij, C. Adams, Y. P. Wang, and F. O'Gara.** 2009. MexT modulates virulence determinants in *Pseudomonas aeruginosa* independent of the MexEF-OprN efflux pump. *Microb Pathog* **47**:237-41.
